# Supplementary material
Source: HighWire-hosted journal article supplement (https://bmjopen.bmj.com/content/12/5/e053693)
Supplement: inline-supplementary-material-1 [file inline-supplementary-material-1.xlsx]

## Sheet: sig_responses
Table S01. Statistically significant responses (p < 0.05), including their standard errors and z-values, of demographic characteristics in the respondents’ knowledge or interest in medicines research as determined by logistic regression
Term	Estimate	Standard error	Test statistic	P-value	Dep_variable	Variable type
Age group	-0.353847	0.14716	-2.4045	0.0161947	Patients role and responsibilities	Current knowledge
Medical research participation	-1.00903	0.429815	-2.3476	0.0188947	Patients role and responsibilities	Current knowledge
Medical research participation	-1.09389	0.4072	-2.68638	0.00722313	Personalized medicine	Current knowledge
Age group	-0.33657	0.124241	-2.70901	0.0067485	Predictive medicine	Current knowledge
Medical research participation	-1.15345	0.365103	-3.15923	0.00158185	Predictive medicine	Current knowledge
Medical research participation	-1.02614	0.387176	-2.65033	0.00804138	Clinical trials	Current knowledge
Medical research participation	-1.02034	0.422813	-2.41322	0.0158124	HTA	Current knowledge
Age group	-0.41854	0.149625	-2.79726	0.00515373	Regulation	Current knowledge
Medical research participation	-1.43732	0.411142	-3.49593	0.00047241	Regulation	Current knowledge
Gender	-0.576599	0.204123	-2.82476	0.0047316	Medicines safey	Interest in learning more
Gender	-0.456449	0.201298	-2.26753	0.0233578	Personalized medicine	Interest in learning more
Gender	-0.579182	0.202633	-2.85828	0.00425944	Predictive medicine	Interest in learning more
Gender	-0.45439	0.210839	-2.15515	0.0311498	Clinical trials	Interest in learning more
Gender	-0.742325	0.217014	-3.42063	0.000624753	HTA	Interest in learning more
Gender	-0.743501	0.235934	-3.15132	0.00162536	Regulation	Interest in learning more
Education	-0.178331	0.0738185	-2.4158	0.0157007	HTA	Interest in learning more
Education	-0.220926	0.0795271	-2.778	0.00546948	Regulation	Interest in learning more
Medical research participation	-0.802106	0.290984	-2.75653	0.00584189	Regulation	Interest in learning more
