# Supplementary material
Source: HighWire-hosted journal article supplement (https://bmjopen.bmj.com/content/12/5/e053693)
Supplement: inline-supplementary-material-2 [file inline-supplementary-material-2.pdf]

### Kysely kansalaisten lääkekehitykseen liittyvistä tiedontarpeista

Lääkekehitys on pitkä, monimutkainen ja kallis prosessi, josta potilailla ja muilla sidosryhmillä ei välttämättä ole riittävästi tietoa. Siksi Eurooppalainen potilasakatemia (EUPATI) tuottaa potilaille ja muille sidosryhmille suunnattua tietoa lääkekehityksestä. Tavoitteena on kasvattaa lääkekehityksen tunnettuutta, välittää tietoa lääketutkimuksista sekä lisätä potilaiden osallistumis- ja vaikutusmahdollisuuksia lääkekehityksen eri vaiheissa.

Tämän kyselyn tavoitteena on selvittää kansalaisten kiinnostusta, tietämystä ja kokemuksia lääkekehityksestä sekä kartoittaa tiedontarpeita ja toiveita koskien eri tiedonsaantikanavien käyttöä. Tuloksista laaditaan raportti ja lisäksi tuloksia tullaan hyödyntämään lääkekehitykseen liittyvien materiaalien tuottamisessa potilaille ja muille sidosryhmille.

Tämän kyselyn on laatinut Manchesterin yliopiston ja European Genetic Alliances Networkin johtama yhteistyöryhmä osana Euroopan komission ja Innovative Medicines Initiative:n rahoittamaa projektia "European Patients' Academy on Therapeutic Innovation (EUPATI)" (lisätietoja: [www.eupati.eu](http://www.eupati.eu)). Suomessa kyselyn toteuttaa Suomen Syöpäpotilaat ry:n tilauksesta Kantar TNS Oy.

Vastaukset ovat luottamuksellisia. Yksittäisiä vastauksia ei tulla esittämään eikä julkaisemaan. Kantar TNS Oy toimittaa vastaukset Suomen Syöpäpotilaat ry:lle nimettömänä. Nimettömien vastausten pohjalta kootut tulokset jaamme potilasryhmien kanssa ja esitämme yhteenvedot tuloksista konferensseissa, tieteellisissä julkaisuissa sekä lehtiartikkeleissa. Suomen Syöpäpotilaat ry huolehtii tietojen tallentamisesta tietosuojakäytäntöjen mukaisesti.

Siirtymällä seuraavalle sivulle osoitat, että olet lukenut, ymmärtänyt ja hyväksynyt yllä olevan kuvauksen kyselystä ja että haluat osallistua kyselyyn.

Siirry eteenpäin

En ole kiinnostunut osallistumaan (SULJE)

Kiitos, että osallistut kyselyyn. Aluksi haluaisimme kuulla kokemuksianne lääkekehityksestä.

1. Oletko koskaan aiemmin ollut tai oletko parhaillaan osallisena lääketieteellisessä tutkimuksessa? *Lääketieteellisellä tutkimuksella tarkoitamme tutkimuksia, joissa selvitetään sairauksien syntymistä tai joissa kehitetään uusia hoitomuotoja ihmisille.*

|       |  |
|-------|--|
| Kyllä |  |
| Ei    |  |

2. Miten hyväksi arvioisit tietosi lääkkeiden kehittämisestä?

| 1                      | 2 | 3 | 4 | 5                           |
|------------------------|---|---|---|-----------------------------|
| En ole kuullut asiasta |   |   |   | Tietoni ovat erittäin hyvät |

3. Alla on kuvauksia lääkekehityksen eri osa-alueista. Pyydämme teitä lukemaan ne läpi ja arvioimaan tämänhetkisen osaamisenne tason.

|                                                                                                                                                                                                                                                                                                               | 1                      | 2 | 3                                       | 4 | 5                           |
|---------------------------------------------------------------------------------------------------------------------------------------------------------------------------------------------------------------------------------------------------------------------------------------------------------------|------------------------|---|-----------------------------------------|---|-----------------------------|
|                                                                                                                                                                                                                                                                                                               | En ole kuullut asiasta |   | Minulla on jonkin verran tietoa asiasta |   | Tietoni ovat erittäin hyvät |
| <b>Lääkekehitys</b> – <i>Prosessi, jossa tutkijat lisäävät ymmärrystään sairaudesta selvittämällä sairauteen vaikuttavia geenejä ja proteiineja. Tämän jälkeen etsitään sopivaa yhdistettä, jolla voisi olla vaikutusta kyseisiin geeneihin tai proteiineihin. Tästä yhdisteestä saattaa tulla uusi lääke</i> |                        |   |                                         |   |                             |
| <b>Lääketurvallisuus</b> – <i>Lääkkeiden aiheuttamien sivuvaikutusten havaitsemiseen, ymmärtämiseen ja ehkäisemiseen keskittyvä prosessi</i>                                                                                                                                                                  |                        |   |                                         |   |                             |
| <b>Potilaiden rooli ja velvollisuudet lääkkeiden kehityksessä</b> - <i>Tavat, joilla potilaat ja lääkeyritykset</i>                                                                                                                                                                                           |                        |   |                                         |   |                             |

|                                                                                                                                                                                                        |  |  |  |  |  |
|--------------------------------------------------------------------------------------------------------------------------------------------------------------------------------------------------------|--|--|--|--|--|
| <i>voisivat yhdessä edistää uusien lääkkeiden kehittämistä</i>                                                                                                                                         |  |  |  |  |  |
| <b>Yksilöllistetty hoito</b> - Potilaan perimästä (geeneistä) saatavilla olevien tietojen käyttäminen sopivimman lääkehoidon valitsemisessa                                                            |  |  |  |  |  |
| <b>Ennakoiva terveydenhoito</b> - Potilaan perimästä (geeneistä) saatavilla olevien tietojen käyttäminen sairauksien arvioimiseen                                                                      |  |  |  |  |  |
| <b>Kliinisten lääketutkimusten suunnittelu ja tavoitteet</b> - Tutkimukset, joissa selvitetään miten uudet hoitomuodot, esim. lääkeaineet tai rokotteet, vaikuttavat ihmisiin                          |  |  |  |  |  |
| <b>Terveydenhuollon menetelmien arviointi</b> - uusien menetelmien (kuten lääkeaineiden) arviointi sen perusteella miten hyvin ne toimivat sairauksien ehkäisemisessä, diagnosoinnissa ja hoitamisessa |  |  |  |  |  |
| <b>Lääkehoitojen kustannusvaikuttavuus</b> - Lääkkeiden kustannusten, riskien ja hyötyjen arvioiminen ja vertaaminen eri hoitovaihtoehtoihin, sekä resurssien kustannustehokkaan käytön määrittäminen  |  |  |  |  |  |
| <b>Uusien lääkkeiden kansallinen säätely</b> - Uusien lääkkeiden tehoa, turvallisuutta ja samalla kansalaisten terveyttä turvaavat viranomaistahot ja lainsäädäntö.                                    |  |  |  |  |  |

## 4. Mistä lääkekehityksen osa-alueista olisit kiinnostunut oppimaan lisää?

|                                                                                                                                                                                                                                                                                                         | En lainkaan kiinnostunut |   |   |   | Erittäin kiinnostunut |
|---------------------------------------------------------------------------------------------------------------------------------------------------------------------------------------------------------------------------------------------------------------------------------------------------------|--------------------------|---|---|---|-----------------------|
|                                                                                                                                                                                                                                                                                                         | 1                        | 2 | 3 | 4 | 5                     |
| <b>Lääkekehitys</b> - Prosessi, jossa tutkijat lisäävät ymmärrystään sairaudesta selvittämällä sairauteen vaikuttavia geenejä ja proteiineja. Tämän jälkeen etsitään sopivaa yhdistettä, jolla voisi olla vaikutusta kyseisiin geeneihin tai proteiineihin. Tästä yhdisteestä saattaa tulla uusi lääke. |                          |   |   |   |                       |
| <b>Lääketurvallisuus</b> - Lääkkeiden aiheuttamien sivuvaikutusten havaitsemiseen, ymmärtämiseen ja ehkäisemiseen keskittyvä prosessi                                                                                                                                                                   |                          |   |   |   |                       |
| <b>Potilaiden rooli ja velvollisuudet lääkkeiden kehityksessä</b> – Tavat, joilla potilaat ja lääkeyritykset voisivat yhdessä edistää uusien lääkkeiden kehittämistä                                                                                                                                    |                          |   |   |   |                       |
| <b>Yksilöllistetty terveydenhoito</b> - Potilaan perimästä (geeneistä) saatavilla olevien tietojen käyttäminen sopivimman lääkehoidon valitsemisessa                                                                                                                                                    |                          |   |   |   |                       |

|                                                                                                                                                                                                                  |  |  |  |  |  |
|------------------------------------------------------------------------------------------------------------------------------------------------------------------------------------------------------------------|--|--|--|--|--|
| <b>Ennakoiva terveydenhoito -</b><br><i>Potilaan perimästä (geeneistä) saatavilla olevien tietojen käyttäminen sairausriskien arvioimisessa.</i>                                                                 |  |  |  |  |  |
| <b>Kliinisten lääketutkimusten suunnittelu ja tavoitteet -</b><br><i>Tutkimukset, joissa selvitetään miten uudet hoidot, esim. lääkkeet tai rokotteet, vaikuttavat ihmisiin.</i>                                 |  |  |  |  |  |
| <b>Terveydenhuollon menetelmien arviointi -</b><br><i>Uusien menetelmien (kuten lääkkeiden) arviointi sen perusteella miten hyvin ne toimivat sairauksien ehkäisemisessä, diagnosoinnissa ja hoitamisessa.</i>   |  |  |  |  |  |
| <b>Lääkehoitojen kustannusvaikuttavuus -</b><br><i>Lääkkeiden kustannusten, riskien ja hyötyjen arvioiminen ja vertaaminen eri hoitovaihtoehtoihin, sekä resurssien kustannustehokkaan käytön määrittäminen.</i> |  |  |  |  |  |
| <b>Uusien lääkkeiden kansallinen säätely -</b><br><i>Uusien lääkkeiden tehoa, turvallisuutta ja samalla kansalaisten terveyttä turvaavat viranomaistahot ja lainsäädäntö.</i>                                    |  |  |  |  |  |

5. Mitä seuraavista tietolähteistä käytät saadaksesi tietoa lääketieteellisistä asioista?  
(Merkitse niin monta kuin haluat)

|                                                  |  |
|--------------------------------------------------|--|
| Internetsivustot                                 |  |
| Wiki-sivustot kuten Wikipedia                    |  |
| Sosiaalinen media kuten Facebook, Twitter ym.    |  |
| YouTube                                          |  |
| Internetissä toimivat vertaistukiryhmät          |  |
| Verkkopohjaiset oppimateriaalit                  |  |
| Oppimateriaalit                                  |  |
| Esitykset                                        |  |
| Esitteet                                         |  |
| Kirjat                                           |  |
| Aikakauslehtiartikkelit                          |  |
| Sanomalehtiartikkelit                            |  |
| Televisio-ohjelmat                               |  |
| Radio-ohjelmat                                   |  |
| Videot tai elokuvat                              |  |
| Sarjakuvat                                       |  |
| Julkiset luennot tai konferenssit                |  |
| Kurssit                                          |  |
| Lääkärit tai muut terveydenhuollon ammattilaiset |  |
| Muu (mikä)                                       |  |

6. Mistä seuraavista tietolähteistä olisit kiinnostunut saamaan tietoa lääkkeiden kehityksestä?

|                                               | En lainkaan kiinnostunut |   |   |   | Erittäin kiinnostunut |
|-----------------------------------------------|--------------------------|---|---|---|-----------------------|
|                                               | 1                        | 2 | 3 | 4 | 5                     |
| Internetsivustot                              |                          |   |   |   |                       |
| Wiki-sivustot kuten Wikipedia                 |                          |   |   |   |                       |
| Sosiaalinen media kuten Facebook, Twitter ym. |                          |   |   |   |                       |
| YouTube                                       |                          |   |   |   |                       |
| Internetissä toimivat vertaistukiryhmät       |                          |   |   |   |                       |

|                                                  |  |  |  |  |  |
|--------------------------------------------------|--|--|--|--|--|
| Verkkopohjaiset oppimateriaalit                  |  |  |  |  |  |
| Oppimateriaalit                                  |  |  |  |  |  |
| Esitykset                                        |  |  |  |  |  |
| Esitteet                                         |  |  |  |  |  |
| Kirjat                                           |  |  |  |  |  |
| Aikakauslehtiartikkelit                          |  |  |  |  |  |
| Sanomalehtiartikkelit                            |  |  |  |  |  |
| Televisio-ohjelmat                               |  |  |  |  |  |
| Radio-ohjelmat                                   |  |  |  |  |  |
| Videot tai elokuvat                              |  |  |  |  |  |
| Sarjakuvat                                       |  |  |  |  |  |
| Julkiset luennot tai konferenssit                |  |  |  |  |  |
| Kurssit                                          |  |  |  |  |  |
| Lääkärit tai muut terveydenhuollon ammattilaiset |  |  |  |  |  |
| Muu (mikä)                                       |  |  |  |  |  |

## 7. Keneltä seuraavista haluaisit saada tietoa lääkkeiden kehityksestä? (Merkitse niin monta kuin haluat)

|                                                                           |  |
|---------------------------------------------------------------------------|--|
| Lääkäriltä, sairaanhoitajalta tai muulta terveydenhuollon ammattilaiselta |  |
| Lääketutkimusta tukevilta järjestöiltä                                    |  |
| Viranomaistahoilta                                                        |  |
| Julkisen ja yksityisen sektorin yhteistyöhankkeelta                       |  |
| Sukulaiselta, ystävältä tai kollegalta                                    |  |
| Tiedotusvälineistä                                                        |  |
| Yliopistolta tai joltain muulta akateemiselta instituutiolta              |  |
| Lääkeyritykseltä                                                          |  |
| Potilasjärjestöltä                                                        |  |
| Voittoa tuottamattomalta järjestöltä                                      |  |
| Muu (mikä)                                                                |  |
